# Supplementary material for: The forkhead transcription factor FOXM1 promotes endocrine resistance and invasiveness in estrogen receptor-positive breast cancer by expansion of stem-like cancer cells
Source: Springer Nature journal article supplement (doi:10.1186/s13058-014-0436-4), 2014-09-11

## **FOXM1 Promotes Endocrine Resistance and Invasiveness in Estrogen Receptor-Positive Breast Cancer by Expansion of Stem-Like Cancer Cells**

Anna Bergamaschi, Zeynep Madak-Erdogan, Yu Jin Kim, Yoon-La Choi, Hailing Lu, and Benita S. Katzenellenbogen

### **Supplementary Figures**

**Fig. S1 Comparison of the binding sites for FOXM1, ERK2, and ER $\alpha$  after MCF-7 cell treatment for 45 min with Vehicle (0.1% ethanol), or 10<sup>-6</sup> M Tam, or 10<sup>-8</sup> M E2.** SeqMiner clustering software was used based on co-occupancy of the different factors within a 600-bp window. All data are from our ChIP-seq studies, except for ER $\alpha$  binding site data in the presence of Tam which is from Hurtado et al. [1].

**Fig. S2 Comparison of FOXM1 binding sites from MCF-7 cells after treatment with 10<sup>-6</sup> M OH-Tamoxifen (this study) or from MCF-7 cells in media containing 10% fetal bovine serum and no added hormone or hormone antagonist [2].** Overlap of binding sites was calculated using Venn Diagram utility of Galaxy Cistrome using the default options of the program. 55% of the FOXM1 binding sites we identified after Tamoxifen were also found by Sanders et al. [2].

**Fig. S3 Comparative analysis of FOXM1 and ARF regulation in the ER-positive T47D breast cancer cell line.** **A)** Western blot showing FOXM1, ABCG2, CDC42 and pMAPK levels after ARF (FOXM1 inhibitor) or control (mutant ARF) treatment. **B)** Proliferation assay in T47D control (Ctrl) and ARF treated cells. **C)** OH-Tam sensitivity assay after ARF or control treatment of T47D cells. **D)** Evaluation by qPCR of the expression profiles of *FOXM1*, *ABCG2*, *CDC42* and *RhoB* genes after ARF inhibitor or control mutARF treatment. \*, p<0.05, \*\* p<0.01 versus control.

**Fig. S4 Representative photomicrographs showing each of the FOXM1 scoring categories (0, 1, 2, 3) for FOXM1 protein expression by immunohistochemical detection in breast tumor samples.**

**Fig. S5 Marked reduction of ABCG2 in Tamoxifen resistant MCF-7 (TamR) cells after treatment with ABCG2 siRNA.** Cells were incubated with 20 nM control siRNA or ABCG2-siRNA for 72h and ABCG2 mRNA was then monitored by q-PCR. \*\*, p<0.01.

#### **References for Supplementary Information**

1. Hurtado A, Holmes KA, Ross-Innes CS, Schmidt D, Carroll JS: **FOXA1 is a key determinant of estrogen receptor function and endocrine response.** *Nat Genet* 2011, 43(1):27-33.
2. Sanders DA, Ross-Innes CS, Beraldi D, Carroll JS, Balasubramanian S: **Genome-wide mapping of FOXM1 binding reveals co binding with estrogen receptor alpha in breast cancer cells.** *Genome Biol* 2013, 14(1):R6.

**Supplementary Table S1. BED files of ChIP-seq data for FOXM1 and ERK2 binding sites in OH-tamoxifen-treated ( $10^{-6}$  M, 45 min) cells**



**Figure S2**

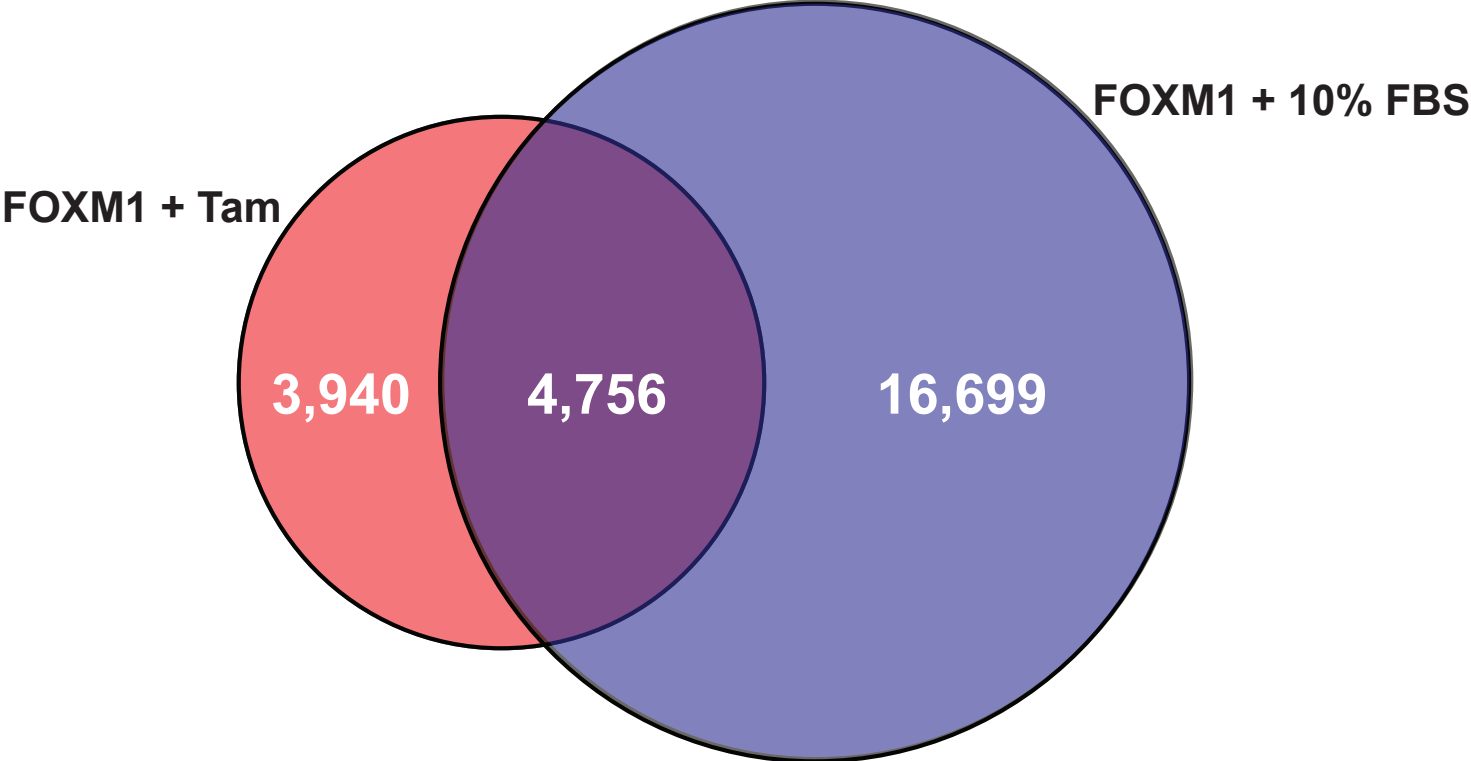



**Fig. S3**

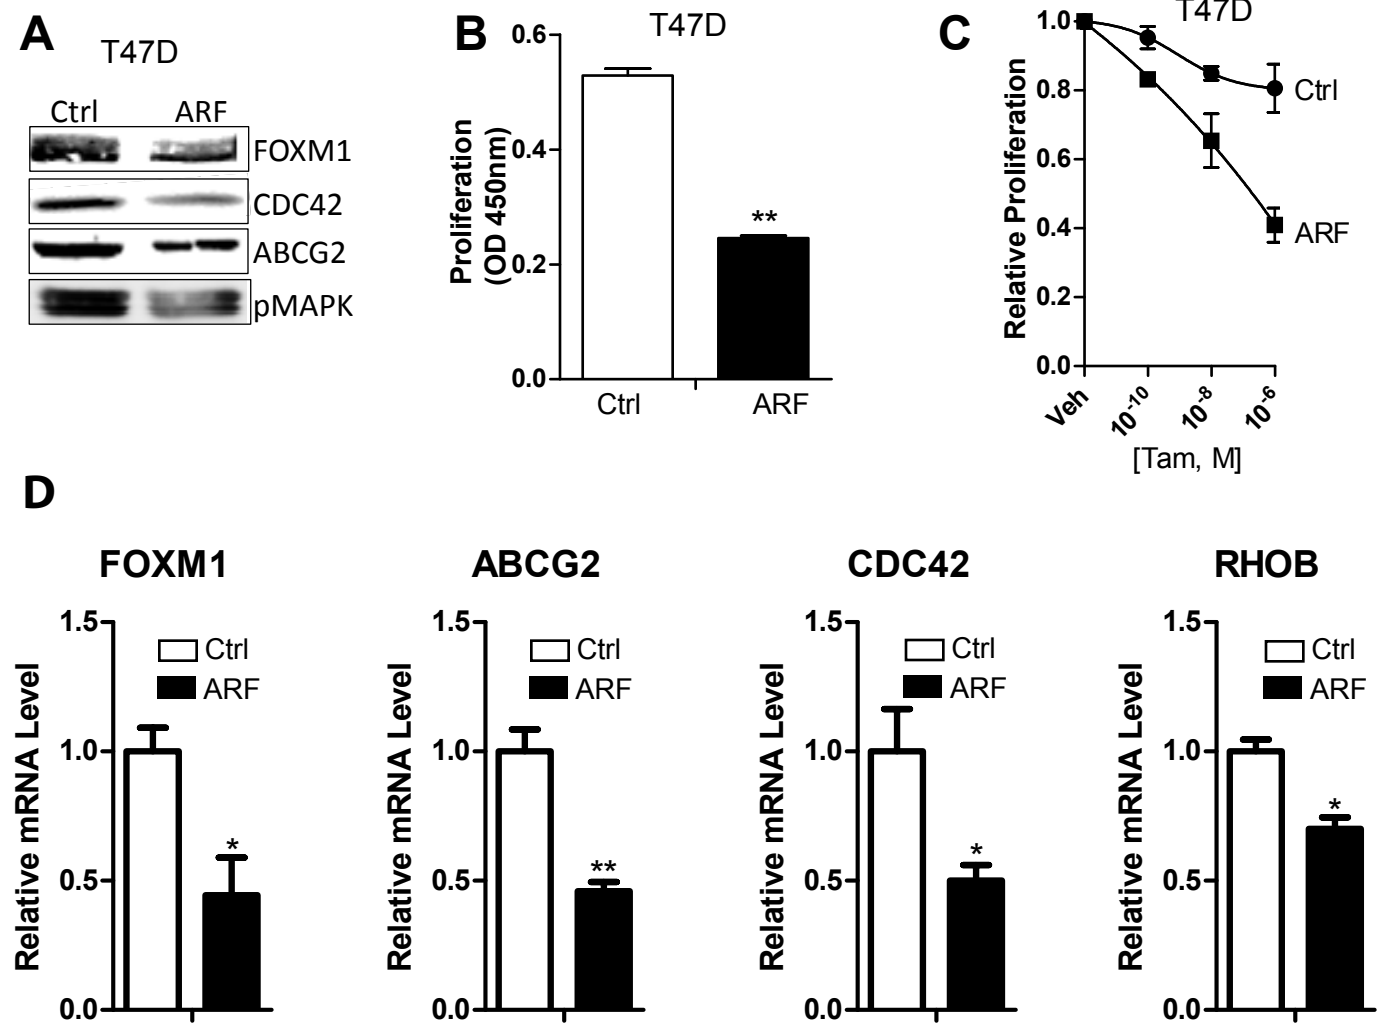

**Figure S4**

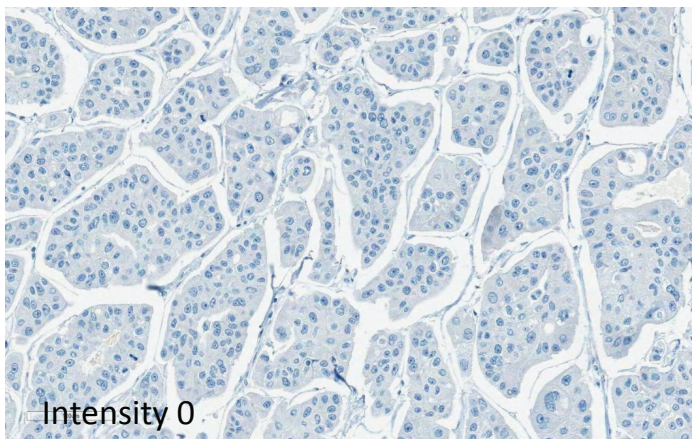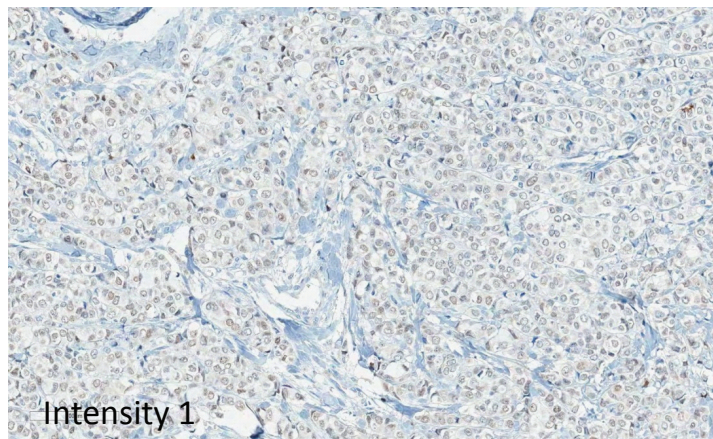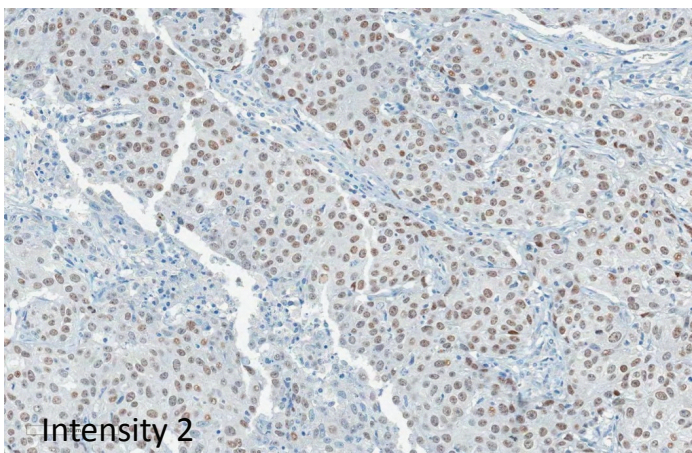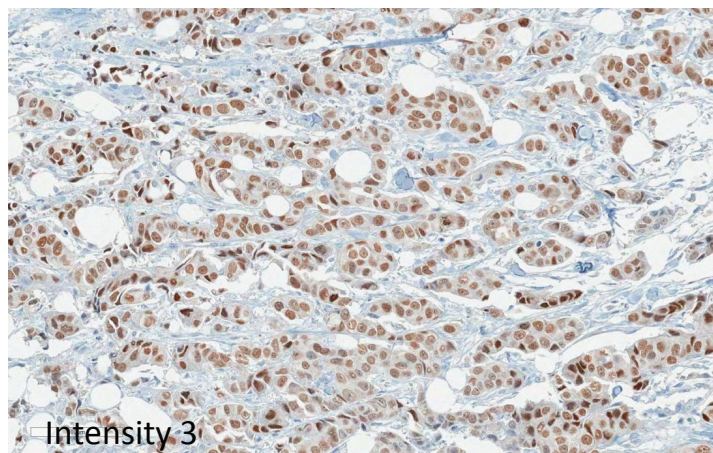

Figure S5

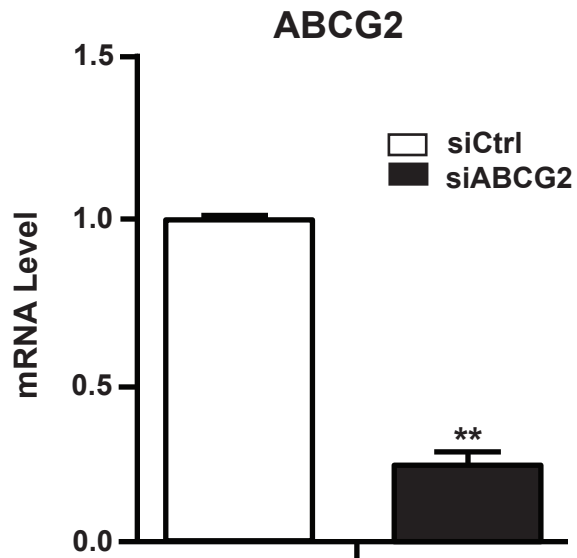

Supplement: MOESM2 [file 9781164]
